# Supplementary material for: A Systematic Review and Bayesian Network Meta-Analysis Investigating the Effectiveness of Psychological Short-Term Interventions in Inpatient Palliative Care Settings
Source: MDPI journal article supplement (doi:10.3390/ijerph19137711), 2022-06-23
Supplement: s1 [file s1]

## Statistical values

### 4 outcome measures = 4 Tables

1. HADS total scale (Hospital Anxiety and Depression Scale)
2. Depression (HADS Depression dimension, BDI I and BDI II)
3. Anxiety (HADS-Anxiety, Anxiety POMS)
4. Distress (VAS-Scales from 0-7 and 0-10)

**Table S1. HADS total (composed of HADS Anxiety and Depression) = 6 studies**

|                       | BASELINE Intervention group                              |                   |                  | BASELINE Control group                               |                   |                  | POST Intervention group                              |                  |               | POST Control group                                   |                   |                  |
|-----------------------|----------------------------------------------------------|-------------------|------------------|------------------------------------------------------|-------------------|------------------|------------------------------------------------------|------------------|---------------|------------------------------------------------------|-------------------|------------------|
| Study                 | N                                                        | Mean              | SD               | N                                                    | Mean              | SD               | N                                                    | Mean             | SD            | N                                                    | Mean              | SD               |
| Juliao et al.<br>2014 | HADS<br>Anxiety:<br>39<br><br>HADS<br>Depression<br>: 39 | 9.67<br><br>12.87 | 4.77<br><br>4.79 | HADS<br>Anxiety: 41<br><br>HADS<br>Depression:<br>41 | 8.88<br><br>13.20 | 4.36<br><br>3.91 | HADS<br>Anxiety: 31<br><br>HADS<br>Depression:<br>31 | 5.17<br><br>9.76 | 0<br><br>3.45 | HADS<br>Anxiety: 37<br><br>HADS<br>Depression:<br>37 | 8.89<br><br>13.68 | 3.58<br><br>4.27 |
| Ando et al.<br>2010   | HADS<br>total: 38                                        | 17.01             | 5.6              | HADS total:<br>39                                    | 20.1              | 8.5              | HADS total :<br>34                                   | 10.3             | 3.2           | HADS total :<br>34                                   | 21.2              | 8.3              |
| Kwan et al.<br>2019   | HADS<br>total: 54                                        | 11.83             | 6.68             | HADS : 55                                            | 12.38             | 5.82             | HADS total:<br>49                                    | 10.73            | 6.91          | HADS total:<br>40                                    | 12.18             | 6.44             |

|                         |                            |       |      |                            |       |       |                           |      |      |                           |      |      |
|-------------------------|----------------------------|-------|------|----------------------------|-------|-------|---------------------------|------|------|---------------------------|------|------|
| Do Carmo<br>et al. 2017 | HADS<br>Anxiety :<br>19    | 5.79  | 3.92 | HADS<br>Anxiety: 22        | 6.27  | 4.84  | HADS<br>Anxiety: 18       | 7.35 | 3.09 | HADS<br>Anxiety: 19       | 7.16 | 4.37 |
|                         | HADS<br>Depression<br>: 19 | 5.11  | 4.51 | HADS<br>Depression:<br>22  | 7.18  | 4.92  | HADS<br>Depression:<br>17 | 5.76 | 3.12 | HADS<br>Depression:<br>19 | 9.29 | 3.73 |
| Greer et al.<br>2012    | HADS<br>Anxiety:<br>20     | 8.79  | 4.64 | HADS<br>Anxiety: 20        | 7.93  | 4.45  | *                         | *    | *    | *                         | *    | *    |
|                         | HADS<br>Depression<br>: 20 | 9.11  | 5.83 | HADS<br>Depression:<br>20; | 7.73  | 3.80  |                           |      |      |                           |      |      |
| Savard et<br>al. 2006   | HADS<br>Anxiety:<br>21     | 10.95 | 3.57 | HADS<br>Anxiety: 16        | 12.36 | 3. 80 | HADS<br>Anxiety: 15       | 6.23 | 3.49 | HADS<br>Anxiety: 13       | 9.51 | 3.57 |
|                         | HADS<br>Depression<br>: 21 | 9.42  | 2.43 | HADS<br>Depression:<br>16  | 8.87  | 2.6   | HADS<br>Depression:<br>15 | 5.19 | 2.44 | HADS<br>Depression:<br>13 | 5.83 | 2.45 |

**Table S2. Depression (composed of HADS Depression, Depression CESD, BDI & BDI II) = 7 studies, 8 measures (see Savard et al.)**

|                       | BASELINE Intervention group |       |      | BASELINE Control group |       |      | POST Intervention group |       |      | POST Control group  |       |      |
|-----------------------|-----------------------------|-------|------|------------------------|-------|------|-------------------------|-------|------|---------------------|-------|------|
| Study                 | N                           | Mean  | SD   | N                      | Mean  | SD   | N                       | Mean  | SD   | N                   | Mean  | SD   |
| Juliao et al. 2014    | HADS Depression : 39        | 12.87 | 4.79 | HADS Depression: 41    | 13.20 | 3.91 | HADS Depression: 31     | 9.76  | 3.45 | HADS Depression: 37 | 13.68 | 4.27 |
| Kwan et al. 2019      | HADS Depression : 54        | 9.17  | 4.52 | HADS Depression: 55    | 8.98  | 4.87 | HADS Depression : 49    | 8.31  | 5.01 | HADS Depression: 40 | 8.63  | 4.94 |
| Do Carmo et al. 2017  | HADS Depression : 19        | 5.11  | 4.51 | HADS Depression: 22    | 7.18  | 4.92 | HADS Depression: 17     | 5.76  | 3.12 | HADS Depression: 19 | 9.29  | 3.73 |
| Greer et al. 2012     | HADS Depression : 20        | 9.11  | 5.83 | HADS Depression: 20    | 7.73  | 3.80 | *                       | *     | *    | *                   | *     | *    |
| Steinhaus et al. 2008 | Depression CESD: 26         | 11.8  | 4.6  | Depression CESD: 26    | 10.7  | 5.1  | Depression CESD: 12     | 8.3   | 3.3  | Depression CESD: 18 | 12.3  | 6.0  |
| Rodin et al. 2019     | BDI II: 22                  | 10.25 | 8.11 | BDI II: 20             | 13.20 | 8.18 | BDI II: 14              | 10.80 | 7.00 | BDI II: N=18        | 11.19 | 7.76 |
| Savard et al. 2006    | HADS Depression : 21        | 9.42  | 2.43 | HADS Depression: 16    | 8.87  | 2.60 | HADS Depression: 15     | 5.19  | 2.44 | HADS Depression: 13 | 5.83  | 2.45 |

|  |         |       |      |         |      |      |         |       |      |         |       |      |
|--|---------|-------|------|---------|------|------|---------|-------|------|---------|-------|------|
|  | BDI: 21 | 21.13 | 5.41 | BDI: 16 | 20.4 | 5.76 | BDI: 15 | 11.52 | 5.42 | BDI: 13 | 15.93 | 5.52 |
|--|---------|-------|------|---------|------|------|---------|-------|------|---------|-------|------|

**Table S3. Anxiety (composed of HADS Anxiety (4), Anxiety POMS(1))= 5 studies**

|                      | BASELINE Intervention group |       |      | BASELINE Control group |       |      | POST Intervention group |      |      | POST Control group |      |      |
|----------------------|-----------------------------|-------|------|------------------------|-------|------|-------------------------|------|------|--------------------|------|------|
| Study                | N                           | Mean  | SD   | N                      | Mean  | SD   | N                       | Mean | SD   | N                  | Mean | SD   |
| Juliao et al. 2014   | HADS Anxiety: 39            | 9.67  | 4.77 | HADS Anxiety: 41       | 8.88  | 4.36 | HADS Anxiety: 31        | 5.17 | 0    | HADS Anxiety: 37   | 8.89 | 3.58 |
| Kwan et al. 2019     | HADS Anxiety : 54           | 2.67  | 3.12 | HADS Anxiety: 55       | 3.40  | 3.12 | HADS Anxiety: 49        | 2.42 | 3.29 | HADS Anxiety: 40   | 3.55 | 3.69 |
| Do Carmo et al. 2017 | HADS Anxiety: 19            | 5.79  | 3.92 | HADS Anxiety: 22       | 6.27  | 4.84 | HADS Anxiety: 18        | 7.35 | 3.09 | HADS Anxiety: 19   | 7.16 | 4.37 |
| Greer et al. 2012    | HADS Anxiety: 20            | 8.79  | 4.64 | HADS Anxiety: 20       | 7.93  | 4.45 | *                       | *    | *    | *                  | *    | *    |
| Savard et al., 2006  | HADS Anxiety: 21            | 10.95 | 3.57 | HADS Anxiety: 16       | 12.36 | 3.80 | HADS Anxiety: 15        | 6.23 | 3.49 | HADS Anxiety: 13   | 9.51 | 3.57 |

|                         |                  |     |     |                  |     |     |                  |     |     |                  |     |     |
|-------------------------|------------------|-----|-----|------------------|-----|-----|------------------|-----|-----|------------------|-----|-----|
| Steinhausen et al. 2008 | Anxiety POMS: 26 | 6.4 | 4.7 | Anxiety POMS: 26 | 4.4 | 4.3 | Anxiety POMS: 12 | 4.1 | 3.5 | Anxiety POMS: 18 | 5.8 | 5.3 |
|-------------------------|------------------|-----|-----|------------------|-----|-----|------------------|-----|-----|------------------|-----|-----|

**Table S4. Distress VAS= 3 studies**

|                                               | BASELINE Intervention group |      |      | BASELINE Control group |      |      | POST Intervention group |      |      | POST Control group |      |      |
|-----------------------------------------------|-----------------------------|------|------|------------------------|------|------|-------------------------|------|------|--------------------|------|------|
| Study                                         | N                           | Mean | SD   | N                      | Mean | SD   | N                       | Mean | SD   | N                  | Mean | SD   |
| Ando et al. 2010<br><br><b>VAS from 0-6</b>   | Distress VAS : 38           | 3.4  | 1.5  | Distress VAS: 39       | 3.6  | 1.5  | Distress VAS: 34        | 1.8  | 1.4  | Distress VAS: 34   | 3.7  | 1.6  |
| Warth et al. 2020<br><br><b>VAS from 0-10</b> | Distress VAS: 42            | 4.17 | 2.04 | Distress VAS: 42       | 3.71 | 2.31 | Distress VAS: 42        | 3.54 | 2.18 | Distress VAS: 42   | 3.78 | 2.06 |
| NG et al. 2016                                | Distress VAS: 30            | 6.29 | 1.66 | Distress VAS: 30       | 6.00 | 1.77 | Distress VAS: 30        | 4.71 | 1.57 | Distress VAS: 30   | 5.79 | 2.01 |

\*Values were either accessed directly from authors or computed by statistician from other variables
